# Supplementary material for: Long-term Outcomes Among Patients With Advanced Kidney Disease Who Forgo Maintenance Dialysis: A Systematic Review
Source: PubMed Central journal article supplement (PMC9907345; doi:10.1001/jamanetworkopen.2022.2255), 2022-03-14

## Supplementary Online Content

Wong SPY, Rubenzik T, Zelnick L, et al. Long-term outcomes among patients with advanced kidney disease who forgo maintenance dialysis: a systematic review. *JAMA Netw Open*. 2022;5(3):e222255. doi:10.1001/jamanetworkopen.2022.2255

**eMethods.** Search Strategy for Medline (EBSCO)

**eTable 1.** Description of Conservatively Managed Cohorts

**eTable 2.** Median Survival and Mean eGFR of Conservatively Managed Cohorts

**eFigure.** Summary of Findings of Current Systematic Review and Recommendations to Advance Conservative Kidney Management

This supplementary material has been provided by the authors to give readers additional information about their work.

## eMethods 1. Search Strategy for Medline (EBSCO)

((MM "Kidney Failure, Chronic+" OR MM "Renal Insufficiency, Chronic+" OR TI ("Chronic Kidney Failure" OR "Chronic Renal Failure" OR "Chronic Renal Insufficiency" OR "advanced chronic kidney disease" OR "advanced chronic kidney diseases" OR "chronic kidney disease" OR "chronic kidney diseases" OR CKD OR "advanced kidney disease" OR "kidney failure" OR "End Stage Kidney Disease" OR "End Stage Renal Disease" OR "End Stage Renal Failure" OR "Late Stage Kidney Disease" OR "Late Stage Renal Disease" OR "Late Stage Renal Failure" OR ESRD OR ESKD))

AND

(MM "Terminal Care+" OR MM "Hospice Care+" OR MM "Palliative Care+" OR MM "Conservative Treatment+" OR MM "Withholding Treatment+" OR MM "Treatment Refusal+" OR TI ("Terminal Care" OR "End of Life Care" OR "Life Care End" OR "Life Care Ends" OR "Hospice Care" OR "Hospice Program" OR "Hospice Programs" OR "Bereavement Care" OR "palliative care" OR "palliative treatment" OR "palliative treatments" OR "palliative therapy" OR "supportive care" OR "conservative treatment" OR "conservative treatments" OR "conservative management" OR "conservative managements" OR "conservative therapy" OR "conservative therapies" OR "conservative care" OR "conservatively managed" OR "conservatively treated") OR AB ("Terminal Care" OR "End of Life Care" OR "Life Care End" OR "Life Care Ends" OR "Hospice Care" OR "Hospice Program" OR "Hospice Programs" OR "Bereavement Care" OR "palliative care" OR "palliative treatment" OR "palliative treatments" OR "palliative therapy" OR "supportive care" OR "conservative treatment" OR "conservative treatments" OR "conservative management" OR "conservative managements" OR "conservative therapy" OR "conservative therapies" OR "conservative care" OR "conservatively managed" OR "conservatively treated") OR TI conservative OR TI conservatively OR TI ((forgo OR forgoing OR without OR withhold\* OR withheld OR decline\* OR declining OR refuse OR refusing OR refusal\* OR refused) N3 (dialysis OR hemodialysis))) OR (AB ((forgo OR forgoing OR without OR withhold\* OR withheld OR decline\* OR declining OR refuse OR refusing OR refusal\* OR refused) N3 (dialysis OR hemodialysis))) OR TI ("maximal medical management" OR "withholding treatment" OR "withholding treatments" OR "withholding therapy" OR "treatment refusal" OR "refusing treatment") OR AB ("maximal medical management" OR "withholding treatment" OR "withholding treatments" OR "withholding therapy" OR "treatment refusal" OR "refusing treatment") OR ((MM "Renal Dialysis+" OR TI "renal dialysis" OR TI "kidney dialysis" OR TI "hemodialysis") AND TI (forgo OR forgoing OR without OR withhold\* OR decline OR declining OR refuse OR refusing OR conservative OR conservatively))))

OR

(AB ("Chronic Kidney Failure" OR "Chronic Renal Failure" OR "Chronic Renal Insufficiency" OR "advanced chronic kidney disease" OR "advanced chronic kidney diseases" OR "chronic kidney disease" OR "chronic kidney diseases" OR CKD OR "advanced kidney disease" OR "kidney

failure" OR "End Stage Kidney Disease" OR "End Stage Renal Disease" OR "End Stage Renal Failure" OR "Late Stage Kidney Disease" OR "Late Stage Renal Disease" OR "Late Stage Renal Failure" OR ESRD OR ESKD) AND (TI ("conservative management" OR "conservative treatment" OR "conservative care" OR "conservative therapy" OR "conservatively managed" OR "conservatively treated") OR AB ("conservative management" OR "conservative treatment" OR "conservative care" OR "conservative therapy" OR "conservatively managed" OR "conservatively treated"))))

NOT

(MH "Case Reports" OR PT "case reports" OR "case report" OR "case reports" OR "case study" OR "case studies")

**eTable 1. Description of Conservatively Managed Cohorts**

| <b>STable 1. Description of conservatively managed cohorts</b> |                                                  |                                                                                                                                                               |                                                           |                                                                                                                                                                                                                                                                                                                        |                             |                                                         |
|----------------------------------------------------------------|--------------------------------------------------|---------------------------------------------------------------------------------------------------------------------------------------------------------------|-----------------------------------------------------------|------------------------------------------------------------------------------------------------------------------------------------------------------------------------------------------------------------------------------------------------------------------------------------------------------------------------|-----------------------------|---------------------------------------------------------|
| <b>Author, year</b>                                            | <b>Country, setting (sites)</b>                  | <b>Study design; aims</b>                                                                                                                                     | <b>Inclusion criteria</b>                                 | <b>Dedicated pathway? Services provided</b>                                                                                                                                                                                                                                                                            | <b>N (mean age, male %)</b> | <b>Comorbidities</b>                                    |
| Brown, 2015                                                    | Australia, Renal Supportive Care Clinic (single) | PRO; compare survival and quality of life between older patients who plan and plan not to receive dialysis                                                    | NR                                                        | Yes. Provided separate from and in addition to usual nephrology care; staffed by palliative care specialist and senior renal palliative care nurse with support of dietician and social worker as needed; focused on symptom management, advance care planning, discussions on prognosis.                              | 122 (82y, 55%)              | CHF 36%, Dem 11.5%, DM 53%                              |
| Carson, 2009                                                   | UK, Low Clearance Clinic (single)                | PRO; compare survival, hospitalization rates and location of death for patients who chose either maximal conservative management or renal replacement therapy | age ≥70, eGFR <30, reached eGFR >10.8 by end of follow-up | Yes. MDT including nephrologist, clinical nurse specialist, dietician, and social worker; includes home visit by social worker; facilitated access to hospice and home palliative care; optimization of Hgb, HTN, volume status, and cholesterol levels; K balance through diet; Ca and P balance targeted to pruritis | 29 (81y, 59%)               | DM 14%                                                  |
| Chan, 2010                                                     | HK, Renal Palliative Care Clinic (single)        | RETRO; describe reasons for decision, management, symptom burden, cause of death,                                                                             | eGFR <15 with DM or eGFR <10, no AKI, underwent           | Yes. Provided by dedicated nephrologists; control of uremic symptoms; flexible follow-up appointments; blood transfusions as needed                                                                                                                                                                                    | 74 (72y, 35%)               | metastatic CA 1%, CHF 28%, COPD 8%, CVA 35%, Dem 1%, DM |

|               |                                           |                                                                                                                                                             |                                                                                                                 |                                                                                                                                                                                                                                                                                                              |                |                                                               |
|---------------|-------------------------------------------|-------------------------------------------------------------------------------------------------------------------------------------------------------------|-----------------------------------------------------------------------------------------------------------------|--------------------------------------------------------------------------------------------------------------------------------------------------------------------------------------------------------------------------------------------------------------------------------------------------------------|----------------|---------------------------------------------------------------|
|               |                                           | survival, place of death, and code status of incident patients who opted for supportive management                                                          | dialysis assessment ;                                                                                           |                                                                                                                                                                                                                                                                                                              |                | 68%, IHD 24%, Liv 1%, PVD 8%                                  |
| Chan, 2020    | HK, Renal Palliative Care Clinic (single) | RETRO; evaluate the impact of a comprehensive program of psychosocial interventions for fluid management among patients who opt for conservative management | age > 60, eGFR <15, enrolled in clinic's comprehensive fluid management program                                 | Yes. Provided jointly by nephrologist and palliative care physician; psychoeducation program provided by palliative care nurse and dietician and focused on diet self-efficacy with the aim to improve patient's knowledge and adherence to self-care behaviors and continuous monitoring of their symptoms. | 138 (82y, 51%) | CA 20%, CHF 47%, CVA 26%, DM 63%, HTN 84%, IHD 57%, Lung 11%, |
| Chandna, 2011 | UK, renal clinics (multi)                 | RETRO; compare survival of conservatively managed patients to those of a contemporaneous group of patients on hemodialysis                                  | age ≥18y, first renal clinic visit with eGFR >15, had at least 1 eGFR 10-15 and all subsequent eGFR <15, no AKI | No. MDT in liaison with community, primary care and hospice services as appropriate; full medical treatment except dialysis                                                                                                                                                                                  | 155 (78y 59%)  | DM 36%                                                        |

|                     |                                                  |                                                                                                                                                                                                                        |                                                                                                                                                   |                                                                                                                             |                |                 |
|---------------------|--------------------------------------------------|------------------------------------------------------------------------------------------------------------------------------------------------------------------------------------------------------------------------|---------------------------------------------------------------------------------------------------------------------------------------------------|-----------------------------------------------------------------------------------------------------------------------------|----------------|-----------------|
| Chandna, 2016       | UK, renal clinics (multi)                        | RETRO; examine the extent to which the rate of kidney functional decline influenced choice of dialysis or conservative kidney management and how eGFR affects the survival of patients in both these treatment groups. | age $\geq 75y$ , eGFR $< 15$ , first nephrology clinic visit with eGFR $> 10$ , no AKI                                                            | No. MDT in liaison with community, primary care and hospice services as appropriate; full medical treatment except dialysis | 158 (82y, 60%) | DM 30%          |
| Cheikh Hassan, 2015 | Australia, Renal Supportive Care Clinic (single) | RETRO; compare the safety and effectiveness of gabapentin for pruritus or restless leg syndrome in conservatively managed patients and patients on hemodialysis                                                        | age $\geq 18y$ , eGFR $< 90$ , at least 2 nephrology clinic visits, has CKD-related pruritis and/or restless leg syndrome treated with gabapentin | NR                                                                                                                          | 34 (80y, 56%)  | CVD 27%, DM 59% |
| Da Silva-Gane, 2012 | UK, Low Clearance Clinics (multi)                | PRO; compare quality of life trajectories and survival in patients opting for conservative kidney                                                                                                                      | eGFR $< 30$ , has decision-making capacity,                                                                                                       | No. MDT of nephrologists, specialist nurses, renal counselors, social workers, dietitians, and community and                | 30 (78y, 70%)  | NR              |

|                     |                                       |                                                                                                                                                                                                                                                             |                                                                                          |                                                                                                                                                                                                                   |                |                                                                     |
|---------------------|---------------------------------------|-------------------------------------------------------------------------------------------------------------------------------------------------------------------------------------------------------------------------------------------------------------|------------------------------------------------------------------------------------------|-------------------------------------------------------------------------------------------------------------------------------------------------------------------------------------------------------------------|----------------|---------------------------------------------------------------------|
|                     |                                       | management and those opting for dialysis.                                                                                                                                                                                                                   | adequate English proficiency                                                             | hospice services; full medical treatment except dialysis                                                                                                                                                          |                |                                                                     |
| De Baise, 2008      | Italy, renal clinic (single)          | RETRO; assess compliance with the Italian clinical practice guidelines for renal failure, comorbidities, hospital stays, and psychometric and quality of life indicators of the patients and their caregivers who chose conservative therapy over dialysis. | age ≥75y, GFR <15, eligible for dialysis, no prior dialysis, clinical follow-up >6months | No. Care in accordance with Italian Society of Nephrology guidelines; dietary counseling on K, Na and fluid intake; diet supplemented with keto-analogues as needed; lab tests and clinic visits every 4–6 weeks. | 11 (82y, 64%)  | NR                                                                  |
| Ellam, 2009         | UK, NR (NR)                           | RETRO; investigate factors influencing survival in a cohort of conservatively managed patients                                                                                                                                                              | eGFR <15, no AKI                                                                         | NR                                                                                                                                                                                                                | 69 (80y*, 58%) | CA 9%, CHF 28%, COPD 20%, CVD 19%, DM 38%, Dem 10%, IHD 32%, PVD 1% |
| Garcia Testal, 2020 | Spain, nephrology department (single) | RETRO; compare the survival of patients on renal replacement therapy with those on conservative treatment and                                                                                                                                               | age >80y, received nephrology consultation                                               | No. Full medical treatment except dialysis                                                                                                                                                                        | 54 (87y, 30%)  | CA 28%. DM 43%, HTN 93%, IHD 31%                                    |

| healthcare resources required by both groups |                                              |                                                                                                                                                          |                                                   |                                                                                                                                                                                                                                                       |                |                                                           |
|----------------------------------------------|----------------------------------------------|----------------------------------------------------------------------------------------------------------------------------------------------------------|---------------------------------------------------|-------------------------------------------------------------------------------------------------------------------------------------------------------------------------------------------------------------------------------------------------------|----------------|-----------------------------------------------------------|
| Hussain, 2013                                | UK, Conservative Management Program (single) | RETRO; compare survival, hospital admissions and palliative care access between patients who chose renal replacement therapy or conservative management. | age >70y, eGFR <20, eligible for dialysis, no AKI | Yes. MDT including palliative medicine consultant; management of fluid and electrolyte balance, Hgb, renal bone disease; care emphasis on quality of life, symptom control and advance care planning.                                                 | 172 (82y, 51%) | CA 19%, CVD 16%, Dem 7%, DM 40%, IHD 36%, Liv 2%, PVD 17% |
| Joly, 2003                                   | France, renal unit (single)                  | RETRO; identify factors influencing therapeutic recommendations between groups proposed either dialysis or conservative treatment                        | age ≥80y, eGFR <10, no prior dialysis, no AKI     | NR. Close cooperation with the family doctor; fluid management including ultrafiltration without dialysis as needed; pharmacologic and nonpharmacologic measures for uremic symptoms, pain; attention to psychologic, social, and spiritual concerns. | 37 (84y, 38%)  | CA 14%, CHF 51%, CVD 22%, DM 22%, IHD 49%, PVD 22%        |



|               |                                             |                                                                                                                                                                                            |                                                                          |                                                                                                                                                                                                                                                                                                                                                        |                |                                                                               |
|---------------|---------------------------------------------|--------------------------------------------------------------------------------------------------------------------------------------------------------------------------------------------|--------------------------------------------------------------------------|--------------------------------------------------------------------------------------------------------------------------------------------------------------------------------------------------------------------------------------------------------------------------------------------------------------------------------------------------------|----------------|-------------------------------------------------------------------------------|
| Kamar, 2017   | Canada, Conservative Care Program (single)  | RETRO; describe the characteristics of patients treated with conservative care                                                                                                             | age ≥75y, eGFR <30, prior nephrology clinic visit, died during follow-up | Yes. Provided by palliative medicine-trained nephrologist, advanced care planning nurse clinician, dedicated conservative care nurses, social worker and dietician as needed; education on prognosis; care guided by patient- and family-specific goals and wishes and symptoms; clinic, telephone and home visits; bereavement services for families. | 154 (81y, 46%) | metastatic CA 5%, CHF 26%, COPD 21%, CVD 25%, DM 56%, IHD 25%, Liv 1% PVD 18% |
| Kilshaw, 2016 | UK, Conservative Management Clinic (single) | PRO; describe the trajectory of functional status within our conservative management population                                                                                            | eGFR <30, has decision-making capacity                                   | Yes. MDT by nephrologist, conservative management specialist nurse, social worker, anemia nurse and dietician and physiotherapist; palliative care service referrals as needed.                                                                                                                                                                        | 41 (83y, 44%)  | NR                                                                            |
| Kwok, 2016a   | HK, Renal Palliative Care Program (single)  | RETRO; evaluate the symptoms and interventions initiated in the last 2 weeks of life, health care service utilization, and causes of death of patients in a Renal Palliative Care Program. | NR                                                                       | Yes. MDT care; structured advance care planning; supported by a palliative home care team in the community; admitted to designated beds under the palliative care team for management of acute needs and end-of-life care as needed                                                                                                                    | 335 (77y, NR)  | CA 9%, CHF 30%, COPD 5%, CVD 29%, Dem 12%, DM 66%, IHD 30%, Liv 11%, PVD 6%   |
| Kwok, 2016b   | UK, renal team (single)                     | RETRO; identify factors associated                                                                                                                                                         | Evaluated for                                                            | Yes. MDT by physicians, specialist nurses, social workers, dietitians,                                                                                                                                                                                                                                                                                 | 432 (80y, 42%) | CA 11%, CHF 29%, CVD                                                          |

|              |                                              |                                                                                                   |                                                                                                                                                   |                                                                                                                                                                                                                                                                                                     |              |                                                        |
|--------------|----------------------------------------------|---------------------------------------------------------------------------------------------------|---------------------------------------------------------------------------------------------------------------------------------------------------|-----------------------------------------------------------------------------------------------------------------------------------------------------------------------------------------------------------------------------------------------------------------------------------------------------|--------------|--------------------------------------------------------|
|              |                                              | with survival in patients managed with either renal replacement therapy or conservative treatment | creatinine level >350 mmol/L with diabetes mellitus or >400 mmol/L without diabetes; age ≥65y, eGFR <15, clinic follow-up throughout study period | occupational therapists, and physiotherapists; medical and sociopsychological management; telephone hotline for symptom control.                                                                                                                                                                    |              | 29%, Dem 13%, DM 60%, IHD 31%, Pulm 4%, Liv 5%, PVD 4% |
| Lovell, 2017 | UK, Conservative Management Service (single) | RETRO; understand patterns of place of death in patients with end-stage kidney disease            | age ≥75y, eGFR <30, prior nephrology clinic visit, died during follow-up                                                                          | Yes. Care in accordance with International Society of Nephrology guidelines; interventions to delay progression of disease, shared decision making, active symptom management, advance care planning, psychological support, social and family support, and cultural and spiritual domains of care. | 146 (NR, NR) | NR                                                     |

|               |                                |                                                                                                                                                                                                                                                    |                                                                                                        |                                                                                                                                                                   |                |                                  |
|---------------|--------------------------------|----------------------------------------------------------------------------------------------------------------------------------------------------------------------------------------------------------------------------------------------------|--------------------------------------------------------------------------------------------------------|-------------------------------------------------------------------------------------------------------------------------------------------------------------------|----------------|----------------------------------|
| Moranne, 2018 | France, renal centers (multi)  | PRO; determine uptake of dialysis, dialysis start conditions, and survival among patients who decided for or against dialysis or postponed this decision.                                                                                          | age >75y, eGFR <20, at least 1 nephrology clinic visit, no prior dialysis or kidney transplant, no AKI | NR                                                                                                                                                                | 124 (NR, NR)   | DM 40%, CA 14%, CHF 42%, CVD 15% |
| Morton, 2016  | Australia, renal units (multi) | PRO; determine the proportion of patients who switched to dialysis after confirmed plans for conservative care and compare survival and end-of-life care among patients choosing conservative care with those initiating renal replacement therapy | eGFR <15, no AKI, no prior kidney transplant or dialysis                                               | NR                                                                                                                                                                | 102 (79y, 51%) | NR                               |
| Murtagh, 2007 | UK, renal units (multi)        | RETRO; compare survival and hospitalization of non-dialysis pathway patients with end-stage kidney disease managed through a Renal Supportive Care                                                                                                 | age >75y                                                                                               | Yes. MDT of physicians, specialist nurses, counselors, and dieticians; additional time and resources for education, psychosocial, medical decision-making support | 77 (83y*, 66%) | NR                               |

|                |                         |                                                                                                                                                               |                                                               |                                                                                                                                                                                                      |                 |                                                              |
|----------------|-------------------------|---------------------------------------------------------------------------------------------------------------------------------------------------------------|---------------------------------------------------------------|------------------------------------------------------------------------------------------------------------------------------------------------------------------------------------------------------|-----------------|--------------------------------------------------------------|
|                |                         | Group to patients who received standard nephrologist-led conservative care                                                                                    |                                                               |                                                                                                                                                                                                      |                 |                                                              |
| Murtagh, 2011a | UK, renal units (multi) | PRO; determine the functional trajectory in the last year of life in end-stage renal disease managed conservatively without dialysis                          | eGFR <15, had decision-making capacity                        | NR                                                                                                                                                                                                   | 74 (81y, 51%)   | NR                                                           |
| Murtagh, 2011b | UK, renal units (multi) | PRO; describe trajectory of symptoms and patient health-related concerns over the last year of life for patients with managed conservatively without dialysis | eGFR <15, has decision-making capacity, died during follow-up | Yes. Dedicated renal palliative care nurse specialists with nephrology staff support as needed; clinic, telephone and home-based care; cooperation with primary care and specialist palliative care. | 49 (81y, 49%)   | CA 18%, CHF 33%, Coll 4%, DM 37%, IHD 35%, PVD 6%, other 33% |
| Phair, 2018    | UK, renal units (multi) | PRO; describe cost and quality of life in patients receiving conservative management for end-stage kidney disease                                             | eGFR ≤15                                                      | NR                                                                                                                                                                                                   | 42 (78y, 40%)   | NR                                                           |
| Pyart, 2020    | UK, renal unit (single) | RETRO; explore how patient characteristics influenced whether patients chose to                                                                               | eGFR <20; attended pre-dialysis education;                    | Yes. A holistic approach involving MDT to help maintain patient quality of life, coordinated care with community physicians,                                                                         | 375 (*83y, 56%) | NR                                                           |

|               |                                                                                               |                                                                                                                                                  |                                                                                                                                                                |                                              |                 |                                                      |
|---------------|-----------------------------------------------------------------------------------------------|--------------------------------------------------------------------------------------------------------------------------------------------------|----------------------------------------------------------------------------------------------------------------------------------------------------------------|----------------------------------------------|-----------------|------------------------------------------------------|
|               |                                                                                               | receive renal replacement therapy or opted for maximal conservative management and survival from the time of their final choice                  |                                                                                                                                                                | geriatricians, and palliative care providers |                 |                                                      |
| Raman, 2018   | UK, Nephrology Secondary Care Clinic or nephrology inpatient ward in a health system (single) | PRO; evaluated whether dialysis has survival advantage compared to conservative care in people who were medically suitable for dialysis therapy. | age >75y, eGFR <15, no prior CHF, no prior cardiac arrest, no prior CA, no Karnofsky Performance Score <60, no dementia, no AKI, no plan for kidney transplant | NR                                           | 81 (84y, 56%)   | CHF 46%, COPD 14%, CVD 19%, DM 30%, IHD 25%, PVD 15% |
| Ramspek, 2021 | Netherland, teaching hospital (single)                                                        | RETRO; develop a prediction tool that predicts the mortality risk for the same patient for both dialysis and                                     | age ≥65y, eGFR <30, prior nephrology care, no AKI                                                                                                              | NR                                           | 126 (*82y, 54%) | CA 14%, CHF 27%, DM 45%, IHD 44%, PVD 51%            |

|                            |                                                                   | conservative care<br>from the time of<br>treatment decision                                                                                                           |                                           |                                            |               |                                                     |
|----------------------------|-------------------------------------------------------------------|-----------------------------------------------------------------------------------------------------------------------------------------------------------------------|-------------------------------------------|--------------------------------------------|---------------|-----------------------------------------------------|
| Reindl-Schwaighofer, 2017  | Austria, tertiary care hospital (single)                          | RETRO; compare survival of conservatively managed patients to patients who started dialysis                                                                           | age >65y, eGFR <10, no AKI, no CA         | NR                                         | 174 (81y, 5%) | CA 16%, COPD 18%, DM 34%, IHD 70%, Liv 13%, PVD 51% |
| Rodriguez Villarreal, 2014 | Spain, pre-dialysis clinic (single)                               | PRO; identify factors influencing decision-making between treatment with dialysis or conservative care                                                                | age >75y, eGFR <30                        | No. Full medical treatment except dialysis | 20 (83y, NR)  | Card 50%, DM 30%, PVD 40%                           |
| Rubio Rubio, 2019          | Spain, hospital nephrology department (single)                    | PRO; analyze variables predictive of mortality in patients opting for conservative kidney management and changes in health-related quality of life in this population | age >75y                                  | NR                                         | 82 (85y, 56%) | NR                                                  |
| Seow, 2013                 | Singapore, renal clinics and ward of a tertiary hospital (single) | PRO; compared health-related quality of life of patients who remained on conservative management versus                                                               | age ≥75 or age-adjusted CCI ≥8, eGFR 8-12 | NR                                         | 63 (60y, 56%) | NR                                                  |

|              |                                     |                                                                                                                |                                                                                |                                                                                                                                                                                               |               |                                                                   |
|--------------|-------------------------------------|----------------------------------------------------------------------------------------------------------------|--------------------------------------------------------------------------------|-----------------------------------------------------------------------------------------------------------------------------------------------------------------------------------------------|---------------|-------------------------------------------------------------------|
|              |                                     |                                                                                                                | those who switched to renal replacement therapy                                |                                                                                                                                                                                               |               |                                                                   |
| Shum, 2014   | HK, tertiary care hospital (single) | RETRO; compare survival of peritoneal dialysis versus conservative management in adults                        | age ≥65y, eGFR <15, assessed for dialysis                                      | No. Management of fluid, Hgb and electrolyte balance and uremic symptoms; telephone hotline for symptom control.                                                                              | 42 (75y, 43%) | CA 5%, CHF 17%, CVD 29%, Dem 2%, DM 67%, IHD 29%, Liv 5%, Lung 2% |
| Smith, 2003  | UK, renal unit (single)             | PRO; study factors influencing the recommendation for palliative non-dialytic treatment and subsequent outcome | no prior dialysis, evaluated for chronic renal failure                         | No. MDT of nephrologists, specialist nurses, renal counselors, social workers, dietitians, and community and hospice services; full medical treatment except dialysis                         | 34 (71y, 38%) | DM 43%                                                            |
| Szeto, 2011  | HK, nephrology clinic (single)      | PRO; study the life expectancy of patients treated conservatively                                              | eligible for dialysis                                                          | NR                                                                                                                                                                                            | 63 (71y, 51%) | Card 24%; CVA 15.8%, DM 65%, PVD 8%                               |
| Teruel, 2015 | Spain, Home Care Program (single)   | PRO; describe implementation of a home-based renal palliative care program                                     | eGFR <30, not eligible for dialysis, referred to hospital palliative care team | Yes. Home-based team directed by primary care provider and in conjunction with nephrology department; care coordination by palliative care unit; monthly visits and lab tests every 3 months. | 76 (81y, 61%) | NR                                                                |

|                |                                         |                                                                                                            |                                                                                                                                                                        |                                                      |                |          |
|----------------|-----------------------------------------|------------------------------------------------------------------------------------------------------------|------------------------------------------------------------------------------------------------------------------------------------------------------------------------|------------------------------------------------------|----------------|----------|
| van Loon, 2019 | Netherlands, hospitals (multi)          | PRO; assess trajectory of quality of life in patients starting dialysis or maximal conservative management | age $\geq 65$ y, eGFR $< 15$ , decision for conservative care within prior 3 months, has decision-making capacity, good Dutch proficiency, no other terminal condition | NR                                                   | 89 (82y, 56%)  | NR       |
| Verberne, 2016 | Netherlands, teaching hospital (single) | RETRO; compare survival of patients choosing either conservative management or renal replacement therapy   | age $\geq 70$ y, no AKI, received nephrology care                                                                                                                      | No. MDT care; full medical treatment except dialysis | 107 (83y, 55%) | Card 77% |
| Verberne, 2018 | Netherlands, teaching hospital (single) | RETRO; compare healthcare costs between patients who have chosen conservative care versus dialysis         | age $\geq 70$ y, eGFR $< 30$ , received nephrology care                                                                                                                | No. MDT care; full medical treatment except dialysis | 126 (83y, 54%) | NR       |



|                |                                         |                                                                                                                                                                                                                                                                                    |                                                                                    |                                                                                                                                                                                                                                                                 |                |                                                                              |
|----------------|-----------------------------------------|------------------------------------------------------------------------------------------------------------------------------------------------------------------------------------------------------------------------------------------------------------------------------------|------------------------------------------------------------------------------------|-----------------------------------------------------------------------------------------------------------------------------------------------------------------------------------------------------------------------------------------------------------------|----------------|------------------------------------------------------------------------------|
| Verberne, 2020 | Netherlands, teaching hospital (single) | RETRO; compare outpatient and inpatient hospital utilization and costs overall and per hospital department in patients on a conservative care or dialysis pathway                                                                                                                  | age ≥70y, eGFR <30, received nephrology care, clinic follow-up during study period | No. MDT care; full medical treatment                                                                                                                                                                                                                            | 100 (83y, 56%) | CA 12%, CHF 29%, DM 45%, IHD 45%, PVD 51%                                    |
| Wong, 2007     | UK, renal unit (single)                 | PRO; evaluate hospitalization rates, survival, prognostic factors influencing the survival of non-dialytic treatment patients and if the Renal Association Standards for renal anemia, renal biochemical parameters, and blood pressure are reached in practice in this population | Prior nephrology care                                                              | Yes. Care in accordance with International Society of Nephrology guidelines; interventions to delay progression of disease, shared decision making, active symptom management, advance care planning, psychological support, social and family support, and cul | 73 (79y*, 51%) | NR                                                                           |
| Wong, 2018     | US, national health system (multi)      | RETRO; compare end-of-life care between patients who receive dialysis, those in whom there was a decision to not pursue dialysis and those who were                                                                                                                                | 2 outpatient eGFR <15 >90 days apart, died during follow-up                        | NR                                                                                                                                                                                                                                                              | 812 (75y, 99%) | CA 32%, CHF 42%, COPD 29%, CVD 13%, Dem 9%, DM 53%, IHD 46%, PAD 17%, Liv 2% |

discussing/preparing  
for dialysis prior to  
death

Abbreviations: AKI, acute kidney injury; CA, cancer; Ca, calcium; Card, unspecified cardiovascular disease; CCI, Charlson Comorbidity Index; Coll, collagen vascular disease; CHF, congestive heart failure; COPD, chronic obstructive pulmonary disease; CVD, cerebrovascular disease; Dem, dementia; DM, diabetes mellitus; eGFR, estimated glomerular filtration rate (ml/min/1.73m<sup>2</sup>); EOL, end-of-life; Hgb, hemoglobin; HK, Hong Kong; HTN, hypertension; IHD, ischemic heart disease; K, potassium; Liv, unspecified liver disease; Lung, unspecified lung disease; MDT, multidisciplinary team; NR, not reported; PVD, peripheral vascular disease; P, phosphate; PRO, prospective cohort; QOL, quality of life; RETRO retrospective cohort; UK, United Kingdom; US, United States.

\* median age

Abbreviations: AKI, acute kidney injury; CA, cancer; Ca, calcium; Card, unspecified cardiovascular disease; CCI, Charlson Comorbidity Index; Coll, collagen vascular disease; CHF, congestive heart failure; COPD, chronic obstructive pulmonary disease; CVD, cerebrovascular disease; Dem, dementia; DM, diabetes mellitus; eGFR, estimated glomerular filtration rate (ml/min/1.73m<sup>2</sup>); EOL, end-of-life; Hgb, hemoglobin; HK, Hong Kong; HTN, hypertension; IHD, ischemic heart disease; K, potassium; Liv, unspecified liver disease; Lung, unspecified lung disease; MDT, multidisciplinary team; NR, not reported; PVD, peripheral vascular disease; P, phosphate; PRO, prospective cohort; QOL, quality of life; RETRO retrospective cohort; UK, United Kingdom; US, United States.

\* median age

**eTable 2. Median Survival and Mean eGFR of Conservatively Managed Cohorts**

| Study, year                | n   | eGFR (ml/min/1.73m <sup>2</sup> ) |    | Survival (months) |    |        |         |        |
|----------------------------|-----|-----------------------------------|----|-------------------|----|--------|---------|--------|
|                            |     | mean                              | SD | mean              | SD | median | IQR     | 95% CI |
| Brown, 2015                | 122 | 16                                | 9  | 16                | NR | ^16    | 7-39    | NR     |
| Carson, 2009               | 29  | &11                               | NR | NR                | NR | 14     | \$9-19  | NR     |
| Chan, 2010                 | 74  | 11                                | 7  | NR                | NR | 7      | \$4-16  | NR     |
| Chan, 2020                 | 138 | ≤15                               | NR | NR                | NR | 10     | *4-20   | NR     |
| Chandna, 2011              | 155 | 13                                | 1  | NR                | NR | 21     | \$13-38 | NR     |
| Chandna, 2016              | 158 | 13                                | 1  | NR                | NR | 23     | \$12-36 | 20-27  |
| Cheikh Hassan, 2015        | 34  | 18                                | 11 | NR                | NR | 8      | 4-12    | NR     |
| Da Silva-Gane, 2012        | 30  | 14                                | 3  | NR                | NR | 30     | \$13-43 | NR     |
| Ellam, 2009                | 69  | <15                               | NR | NR                | NR | 21     | \$11-39 | NR     |
| Garcia Testal, 2020        | 54  | ≤15                               | NR | 19                | 16 | 14     | 6-31    | NR     |
| Hussain, 2013              | 172 | <20                               | NR | NR                | NR | 27     | \$8-49  | NR     |
| Joly, 2003                 | 43  | 8                                 | 1  | NR                | NR | 9      | \$4-14  | 4-10   |
| Kilshaw, 2016              | 41  | 14                                | 4  | NR                | NR | *1     | *0-2    | NR     |
| Kwok, 2016a                | 335 | 13                                | 4  | NR                | NR | 16     | *4-24   | NR     |
| Kwok, 2016b                | 432 | 10                                | 3  | NR                | NR | 10     | \$4-24  | 8-12   |
| Moranne, 2018              | 124 | &13                               | NR | NR                | NR | *13    | *5-25   | NR     |
| Morton, 2016               | 102 | <15                               | NR | NR                | NR | *17    | *7-34   | NR     |
| Murtagh, 2007              | 77  | <15                               | NR | NR                | NR | 22     | \$9-46  | NR     |
| Phair, 2018                | 42  | 13                                | NR | NR                | NR | *39    | *16-79  | NR     |
| Pyart, 2020                | 375 | &15                               | NR | NR                | NR | 25     | *10-50  | 21-28  |
| Raman, 2018\$              | 81  | 13                                | 2  | NR                | NR | \$31   | \$17-46 | NR     |
| Ramspek, 2021              | 126 | 13                                | 5  | NR                | NR | *20    | *8-40   | NR     |
| Reindl-Schwaighofer, 2017  | 174 | <10                               | NR | NR                | NR | 1      | \$1-33  | 0-11   |
| Rodriguez Villarreal, 2014 | 20  | 17                                | 6  | NR                | NR | *37    | *15-75  | NR     |
| Rubio Rubio, 2019          | 82  | 16                                | 3  | NR                | NR | \$27   | \$11-54 | 20-34  |
| Seow, 2013                 | 63  | &10                               | NR | NR                | NR | *17    | *7-34   | NR     |
| Shum, 2014                 | 42  | 7                                 | 2  | NR                | NR | 28     | 14      | 45     |
| Smith, 2003                | 26  | 9                                 | 2  | NR                | NR | 6      | \$4-11  | NR     |
| Szeto, 2011                | 63  | 18                                | 6  | NR                | NR | 41     | NR      | 33-49  |
| Teruel, 2015\$             | 76  | 12                                | 6  | NR                | NR | \$6    | \$2-11  | NR     |
| Van Loon, 2019             | 89  | 12                                | 4  | NR                | NR | *20    | *8-40   | NR     |
| Verberne, 2016             | 107 | 15                                | 5  | NR                | NR | 18     | 8       | 36     |
| Verberne, 2018             | 126 | 16                                | 5  | NR                | NR | 29     | 17-46   | NR     |
| Wong, 2007                 | 73  | 12                                | NR | NR                | NR | 23     | *10-46  | NR     |

\* indicates that median survival and/or IQR estimated using proportion surviving at time (t) assuming exponential distribution

\$ indicates that median survival and/or IQR abstracted from Kaplan-Meier curves

^ indicate that mean values used in place of median values of survival

& median values of eGFR

< threshold values of eGFR

Abbreviations: eGFR, estimated glomerular filtration rate; NR, not reported

**eFigure. Summary of Findings of Current Systematic Review and Recommendations to Advance Conservative Kidney Management**

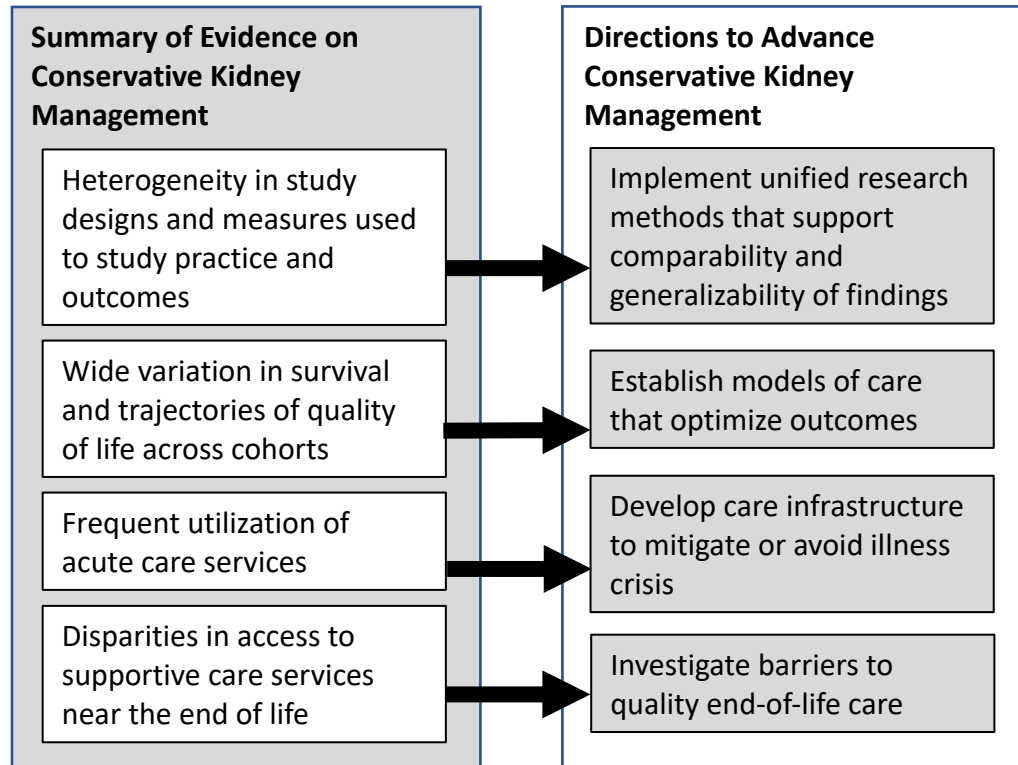

Supplement: jamanetwopen-e222255-s001.pdf [file jamanetwopen-e222255-s001.pdf]
